# Supplementary material for: Methyl acrylatepolymerizations in the presence of a copper/N3S3macrobicyclic cage in DMSO at 25 °C
Source: Royal Society of Chemistry journal article supplement (doi:10.1039/b9py00315k), 2009-12-22
Supplement: b9py00315k.pdf [file b9py00315k.pdf]

Supporting Material to

Methyl Acrylate Polymerizations in the Presence  
of a Copper/N<sub>3</sub>S<sub>3</sub> Macrobicyclic Cage in DMSO  
at 25 °C.

*Craig A. Bell,<sup>a</sup> Qiao Sun,<sup>a</sup> Hong Zhang,<sup>a</sup> Sean C. Smith,<sup>a</sup> Paul V. Bernhardt,<sup>b</sup> Michael J.  
Monteiro\*<sup>a</sup>*

<sup>a</sup> Australian Institute for Bioengineering and Nanotechnology, University of Queensland,  
Brisbane QLD 4072, Australia

<sup>b</sup> School of Chemistry and Molecular Biosciences, University of Queensland, Brisbane  
QLD 4072

\*author to whom correspondence should be sent:

e-mail: [m.monteiro@uq.edu.au](mailto:m.monteiro@uq.edu.au)

**Initiation**

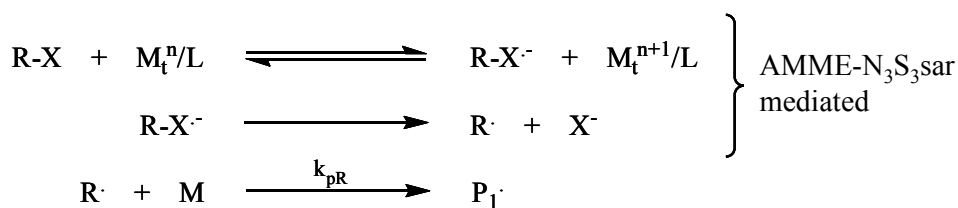

**Propagation**

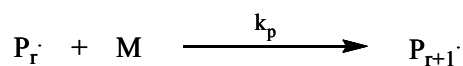

**Pre-equilibrium**

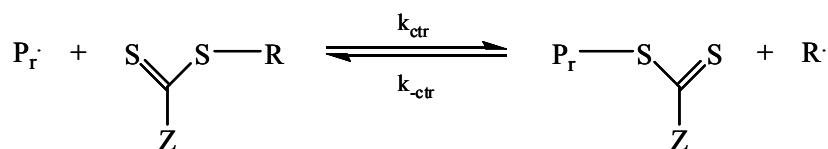

**Main equilibrium**

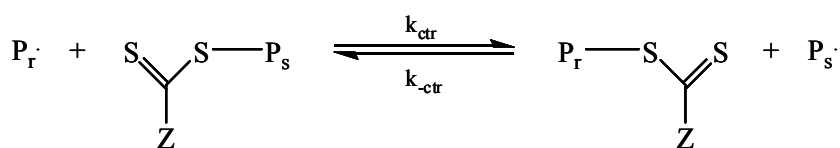

**Termination**

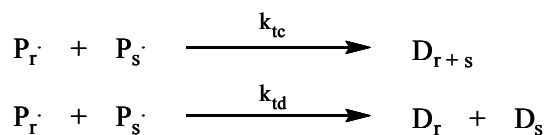

**Scheme S1.** Mechanism for AMME-N<sub>3</sub>S<sub>3</sub>sar mediated initiation and RAFT mediated polymerizations.

$E_{1/2}$ , V (vs  $\text{Fc}^{+/0}$ )

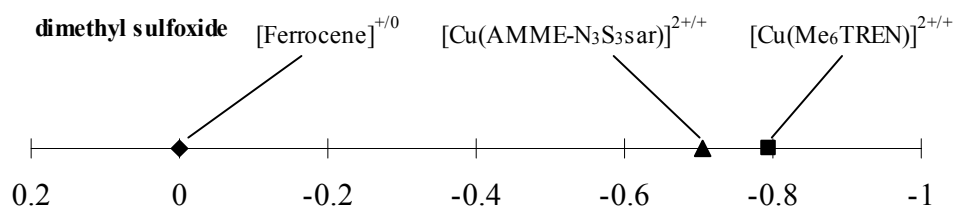

**Figure S1.** Redox potentials of  $\text{CuBr}_2/\text{AMME-N}_3\text{S}_3\text{sar}$ ,  $\text{CuBr}_2/\text{Me}_6\text{TREN}$  and Ferrocene in both dimethyl sulfoxide and acetonitrile. All complex concentrations are 1 mM, contain 0.1 M  $\text{Et}_4\text{NClO}_4$  and are referenced to  $\text{Fc}^{+/0}$ .

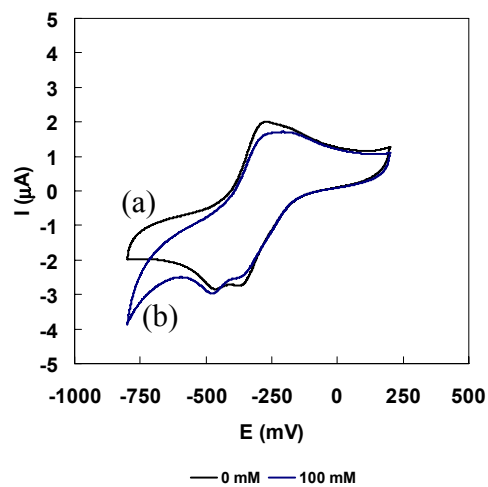

**Figure S2.** Cyclic voltammograms of  $[\text{Cu}(\text{AMME-N}_3\text{S}_3\text{sar})]^{2+/\cdot}$  (a) without EBiB and (b) with EBiB (100 mM) in DMSO. Complex concentrations are 1 mM and all voltammograms are recorded at 50 mV/s scanning rate in 0.1 M  $\text{Et}_4\text{NClO}_4$  and are referenced to  $\text{Ag}/\text{AgNO}_3$ .

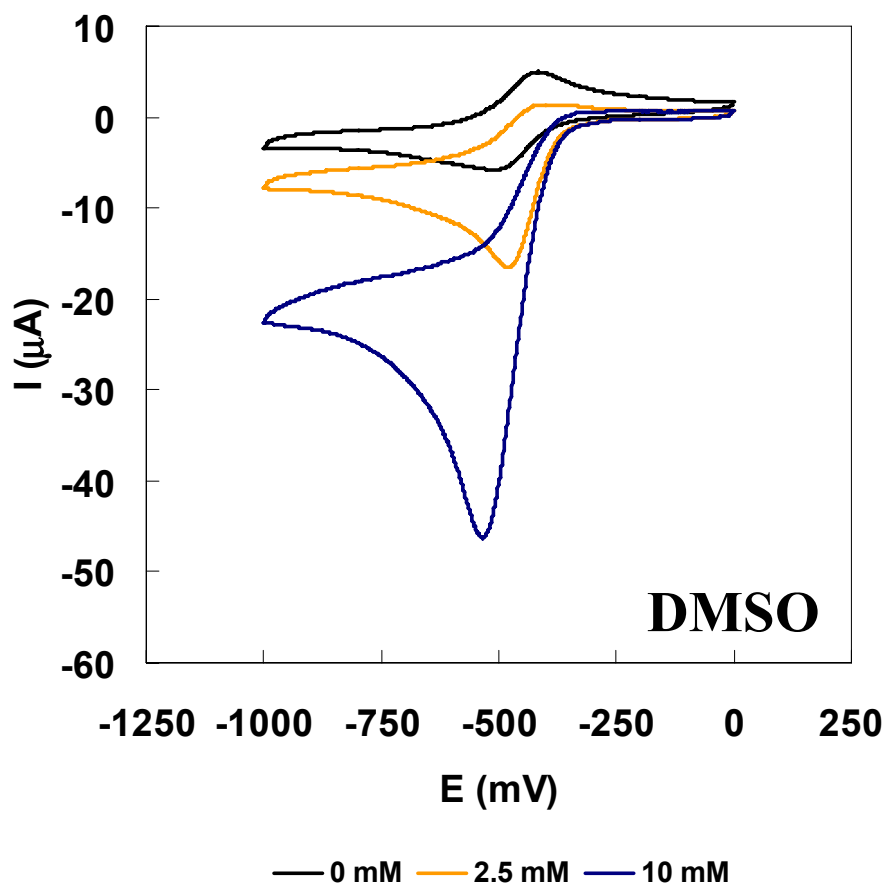

**Figure S3:** Cyclic voltammograms of  $[\text{Cu}(\text{Me}_6\text{TREN})]^{2+/+}$  with varying concentrations of EBiB (0 - 10 mM) in DMSO. Complex concentrations are 1 mM and all voltammograms are recorded at 100 mV/s scanning rate in 0.1 M  $\text{Et}_4\text{NClO}_4$  and are referenced to  $\text{Ag}/\text{AgNO}_3$ .

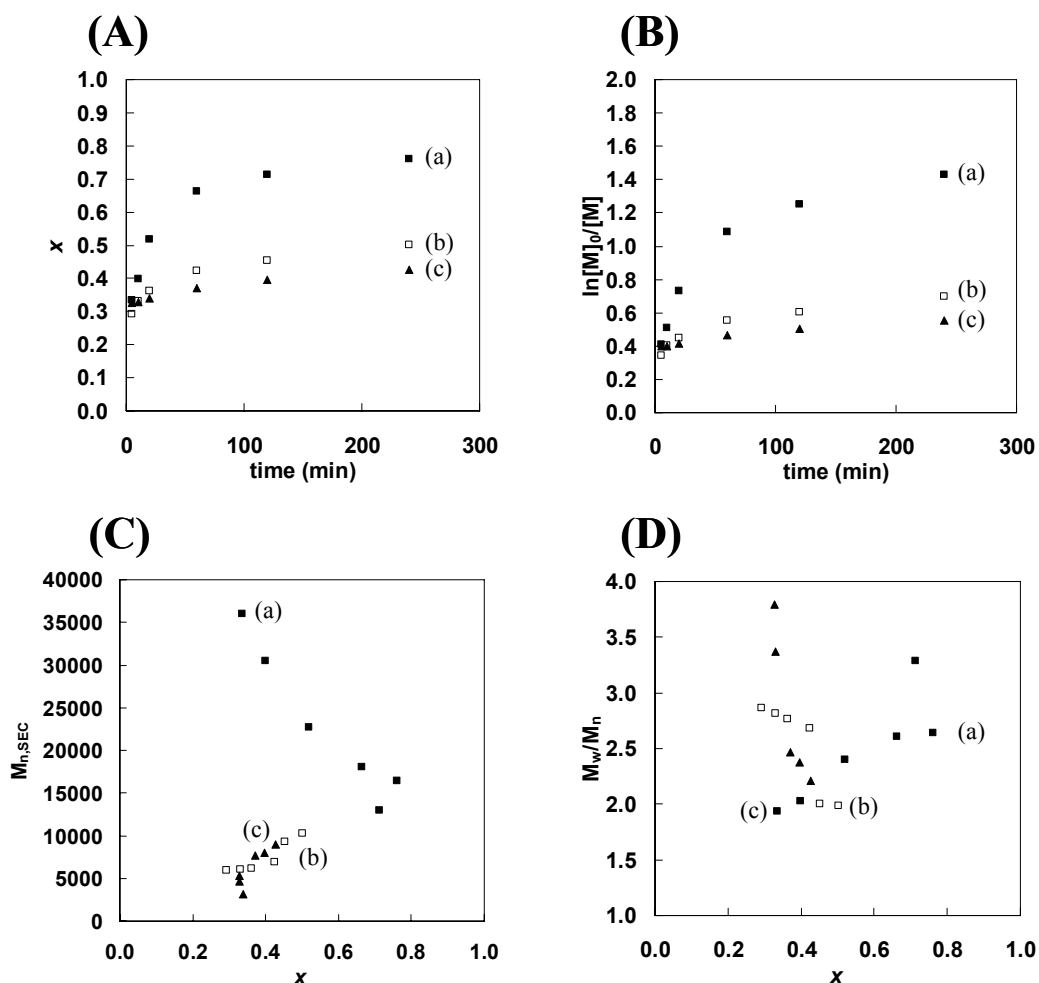

**Figure S4:** Kinetic data for the polymerization of methyl acrylate (3.67 M) in DMSO (9.36 M) at 25 °C with EBiB (1.83 x 10<sup>-2</sup> M), CuBr (1.83 x 10<sup>-2</sup> M) and AMME-N<sub>3</sub>S<sub>3</sub>sar. (A) conversion versus time, (B) ln[M]<sub>0</sub>/[M] versus time (C) number-average molecular weight (M<sub>n,SEC</sub>) versus conversion, and (D) polydispersity index versus conversion. The concentration ratios of reactants [MA]/[EBiB]/[CuBr]/[AMME-N<sub>3</sub>S<sub>3</sub>sar] are (a) 200/1/1/1, (b) 200/1/1/2, and (c) 200/1/1/3

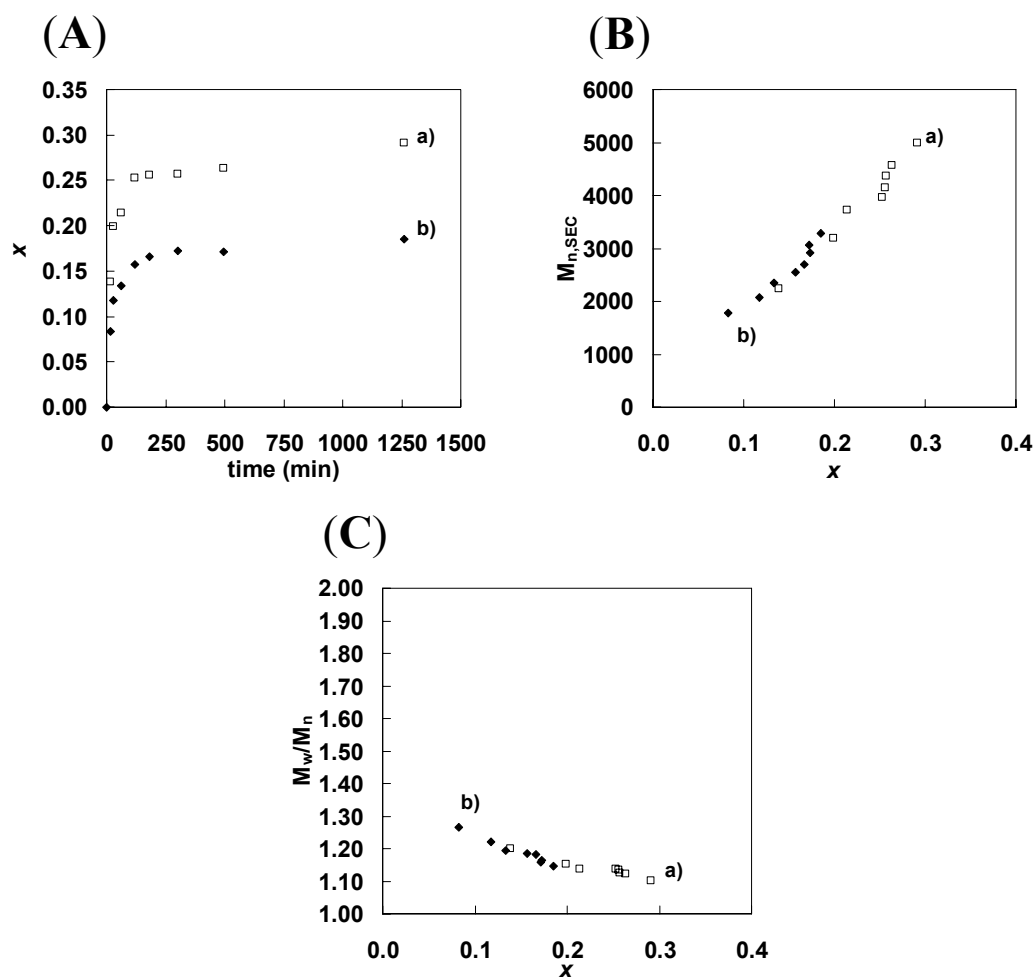

**Figure S5:** Kinetic data for the polymerization of methyl acrylate (3.67 M) in DMSO (9.36 M) at 25 °C with EBiB, MCEBTTC, CuBr and either AMME- $N_3S_3sar$  or  $Me_6TREN$  where  $[MA]/[RAFT]/[EBiB] = 200/1/0.1$ . For all reactions,  $[EBiB]/[CuBr]/[ligand] = 1/1/1$ . (A) conversion vs time, (B) number-average molecular weight ( $M_{n,SEC}$ ) vs conversion, and (C) polydispersity index vs conversion. Curves (a) CuBr/AMME- $N_3S_3sar$  (b) CuBr/ $Me_6TREN$ .

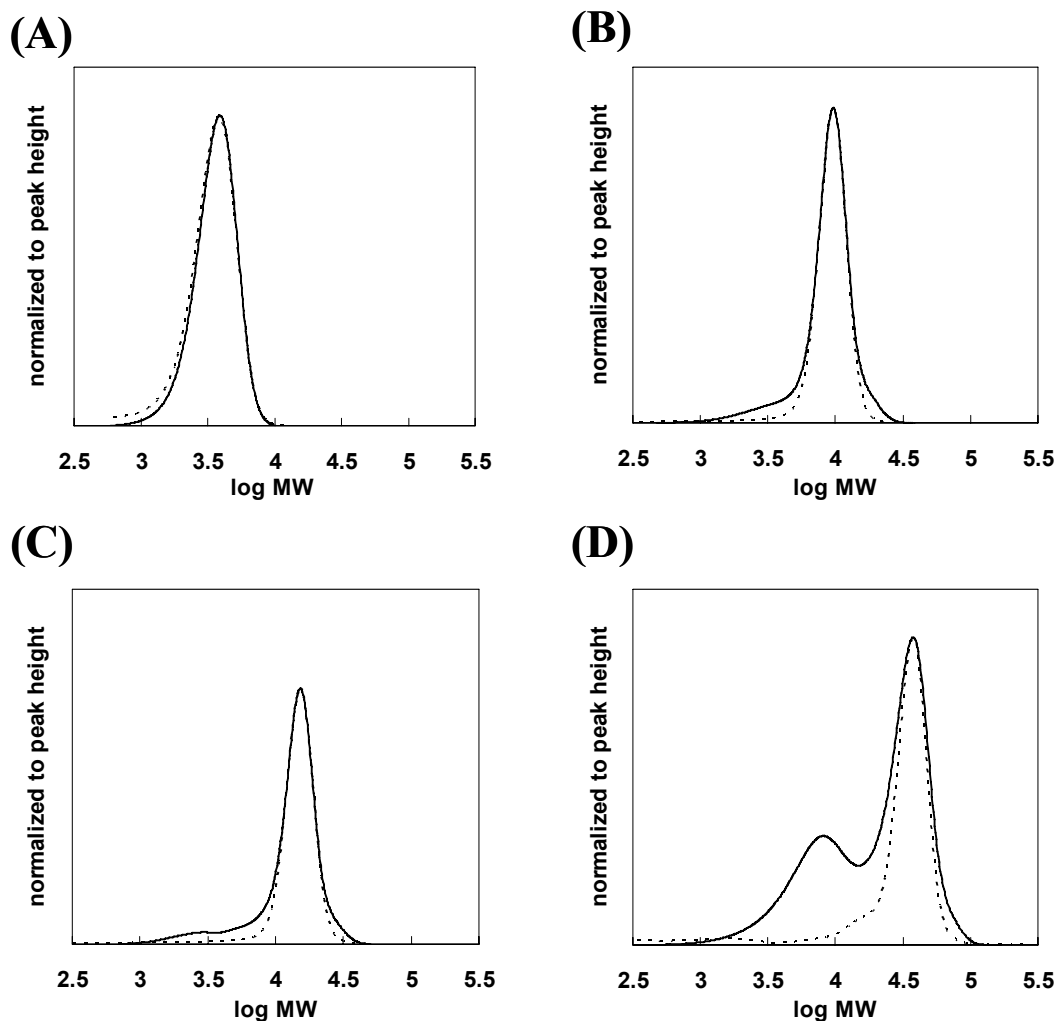

**Figure S6:** Dual detector Size Exclusion Chromatograms of MCEBTTC mediated polymerization of methyl acrylate (3.67 M) in DMSO (9.36 M) at 25 °C with EBiB, MCEBTTC, CuBr and Me<sub>6</sub>TREN at various ratios of initiator (— represents refractive index, --- represents UV absorbance at 306.6 nm). The concentration ratios of reactants [MA]/ [EBiB]/[CuBr]/[Me<sub>6</sub>TREN]/[MCEBTTC] are (A) 200/0.1/0.1/0.1/1, (B) 200/1/1/1/1, (C) 200/1/1/1/0.5, and (D) 200/1/1/1/0.1



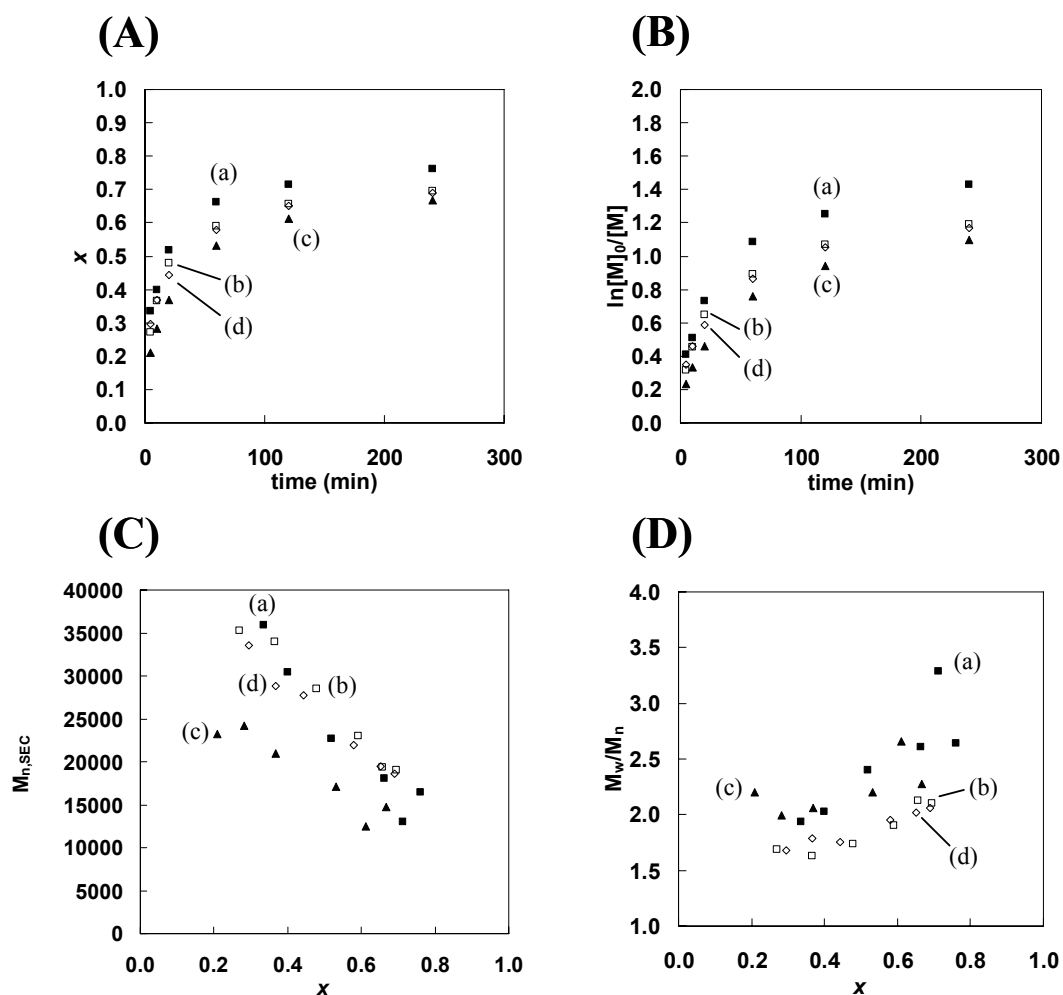

**Figure S7:** Kinetic data for the polymerization of methyl acrylate (3.67 M) in DMSO (9.36 M) at 25 °C with EBiB (1.83 x 10<sup>-2</sup> M), CuBr, [Cu(AMME-N<sub>3</sub>S<sub>3</sub>sar)]Br<sub>2</sub> and AMME-N<sub>3</sub>S<sub>3</sub>sar. (A) conversion versus time, (B)  $\ln[M]_0/[M]$  versus time (C) number-average molecular weight ( $M_{n,SEC}$ ) versus conversion, and (D) polydispersity index versus conversion. The concentration ratios of reactants [MA]/[EBiB]/[CuBr]/[AMME-N<sub>3</sub>S<sub>3</sub>sar]/[[Cu(AMME-N<sub>3</sub>S<sub>3</sub>sar)]Br<sub>2</sub>] are (a) 200/1/1/1/0, (b) 200/1/1/1/0.05, (c) 200/1/1/1/0.1, and (d) 200/1/1/1/0.3
